# Supplementary material
Source: PubMed Central journal article supplement (PMC2532531)

## Supporting Information

### Total Synthesis and Biological Evaluation of 22-Hydroxyacuminatine

Xiangshu Xiao,<sup>†</sup> Smitha Antony,<sup>‡</sup> Yves Pommier,<sup>‡</sup> and Mark Cushman<sup>\*†</sup>

*Department of Medicinal Chemistry and Molecular Pharmacology and the Purdue Cancer Center, School of Pharmacy and Pharmaceutical Sciences, Purdue University, West Lafayette, Indiana 47907, and Laboratory of Molecular Pharmacology, Center for Cancer Research, National Cancer Institute, Bethesda, Maryland 20892-4255*

|                                                                                            |    |
|--------------------------------------------------------------------------------------------|----|
| Title page                                                                                 | S1 |
| Elemental analysis data                                                                    | S2 |
| <sup>1</sup> H NMR spectrum of compounds <b>2b</b> , <b>2c</b> , <b>11</b> , and <b>14</b> | S3 |

---

<sup>†</sup> Purdue University

<sup>‡</sup> National Cancer Institute

Corresponding Author: Phone number: 765-494-1465; fax number: 765-494-6790, e-mail: [cushman@pharmacy.purdue.edu](mailto:cushman@pharmacy.purdue.edu)

### Elemental analysis data

| compd      | Molecular formular                 | calculated                      | found                           |
|------------|------------------------------------|---------------------------------|---------------------------------|
| <b>2b*</b> | $C_{20}H_{14}N_2O_2 \cdot 1.0H_2O$ | C, 72.28; H,<br>4.85; N, 8.43   | C, 71.98; H,<br>4.67; N, 8.06.  |
| <b>2c*</b> | $C_{19}H_{11}N_2OBr$               | C, 62.83; H,<br>3.05; N, 7.71   | C, 62.54; H,<br>3.21; N, 7.42   |
| <b>4</b>   | $C_8H_4Br_2O_2$                    | C, 32.91; H,<br>1.38; Br, 54.74 | C, 32.79; H,<br>1.49; Br, 54.65 |
| <b>6a</b>  | $C_9H_9BrO_2$                      | C, 47.19; H,<br>3.96; Br, 34.88 | C, 47.26; H,<br>4.08; Br, 34.76 |
| <b>7</b>   | $C_8H_5BrO_2$                      | C, 45.10; H,<br>2.37; Br, 37.51 | C, 44.99; H,<br>2.43; Br, 37.34 |
| <b>12</b>  | $C_9H_5NO_2$                       | C, 67.92; H,<br>3.17; N, 8.80   | C, 67.86; H,<br>3.19; N, 8.63   |
| <b>14*</b> | $C_{20}H_{11}N_3O \cdot 0.75H_2O$  | C, 74.41; H,<br>3.90; N, 13.02  | C, 74.69; H,<br>3.66; N, 12.83  |

\* indicates  $^1H$  NMR spectrum was attached in the Supporting Information.

No title

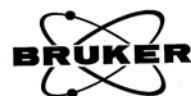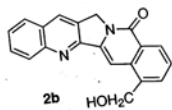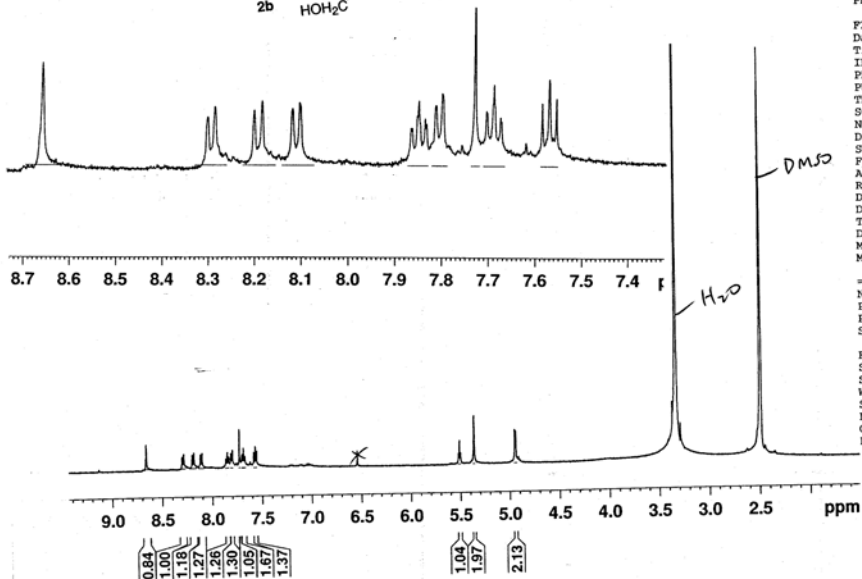

Current Data Parameters  
NAME acuminatinel  
EXPNO 2  
PROCNO 1

F2 - Acquisition Parameters  
Date\_ 20050528  
Time 18.52  
INSTRUM spect  
PROBHD 5 mm TXI HCN X  
PULPROG zg  
TD 65536  
SOLVENT CDCl3  
NS 16  
DS 2  
SWH 10330.578 Hz  
FIDRES 0.157632 Hz  
AQ 3.1720407 sec  
RG 203.2  
DW 48.400 usec  
DE 6.00 usec  
TE 293.9 K  
D1 1.0000000 sec  
MCREST 0.0000000 sec  
MCWRK 0.0150000 sec

===== CHANNEL f1 =====  
NUC1 1H  
P1 10.00 usec  
PL1 0.00 dB  
SFO1 499.8730869 MHz

F2 - Processing parameters  
SI 32768  
SF 499.8700187 MHz  
WDW no  
SSB 0  
LB 0.00 Hz  
GB 0  
PC 1.00

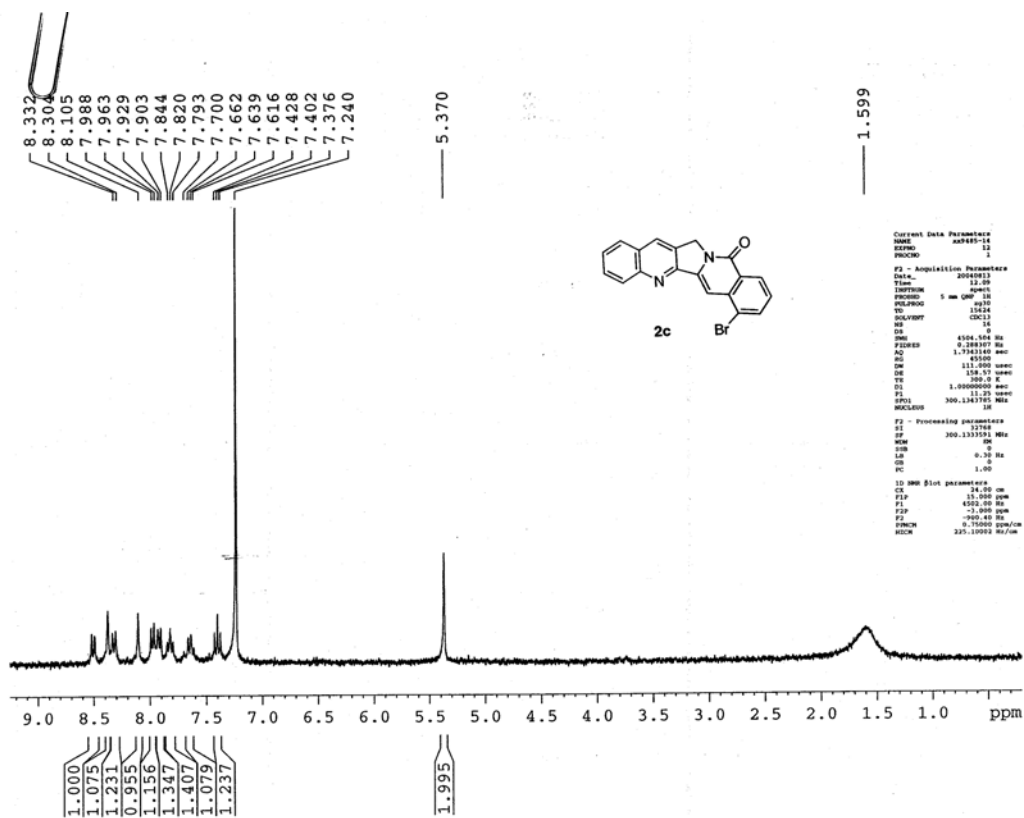

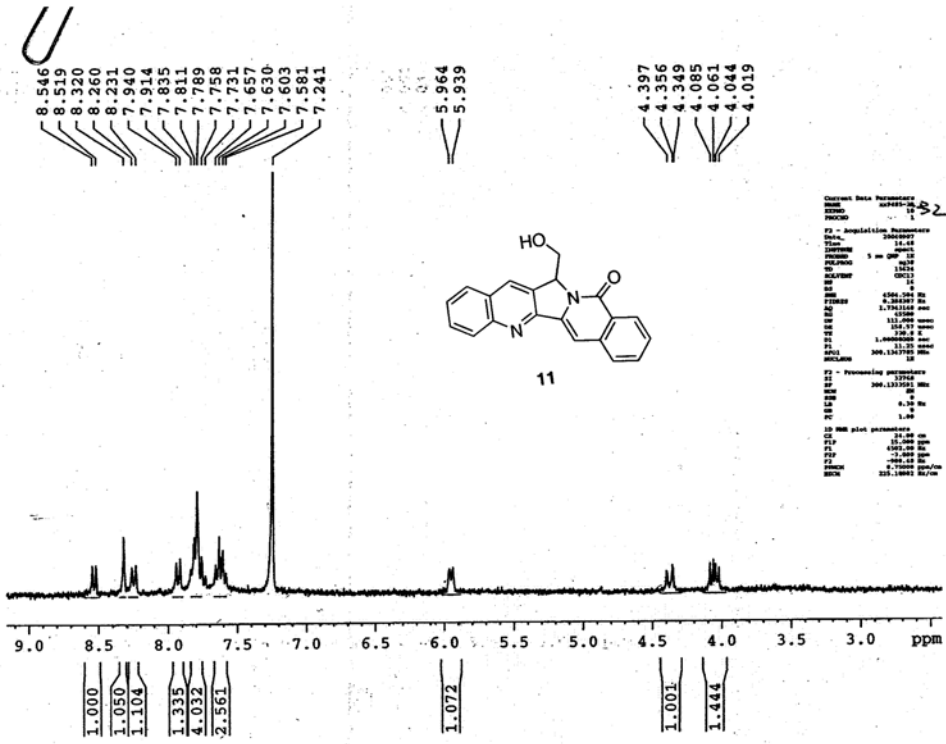

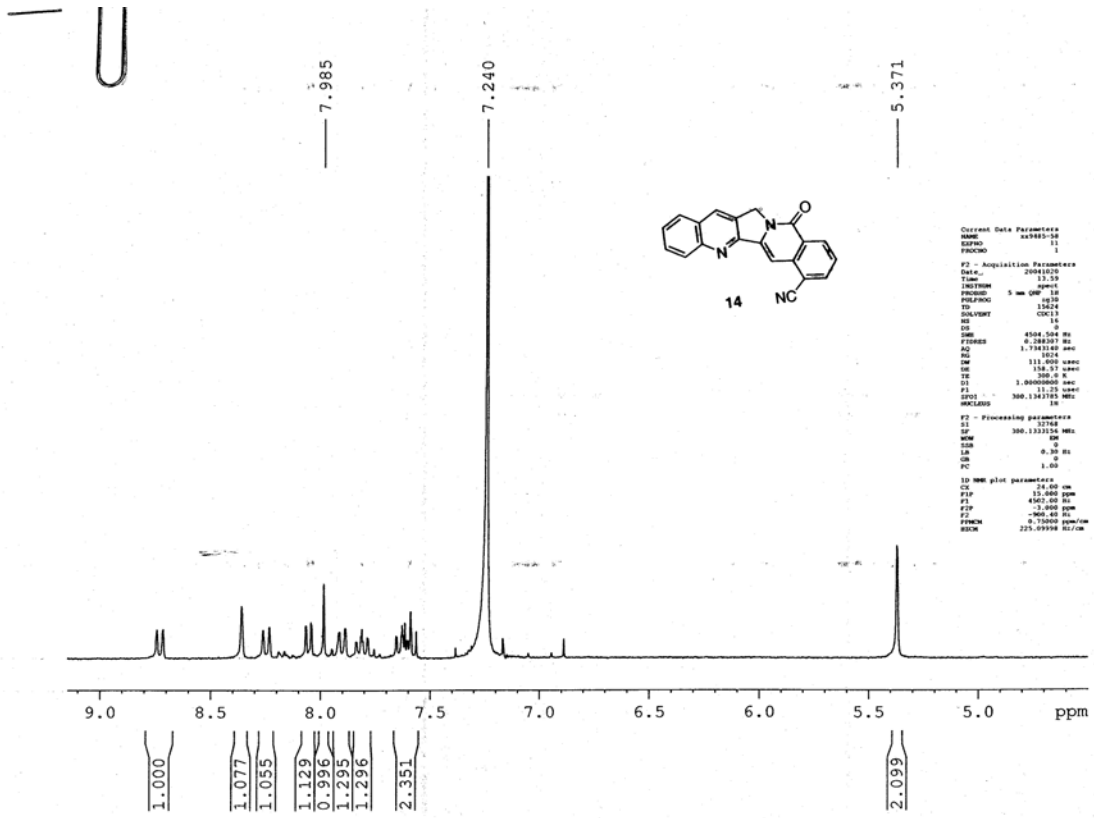

Supplement: NIHMS63125-supplement-1si20060104_02.pdf [file NIHMS63125-supplement-1si20060104_02.pdf]
